# Supplementary material for: New clinical application of three-dimensional-printed polycaprolactone/β-tricalcium phosphate scaffold as an alternative to allograft bone for limb-sparing surgery in a dog with distal radial osteosarcoma
Source: PubMed Central journal article supplement — J Vet Med Sci. 2019 Jan 18;81(3):434–9. doi: 10.1292/jvms.18-0158 (PMC6451899; doi:10.1292/jvms.18-0158), 2019-01-18

**Suppl. Fig. 1.** Cytologic images of local tumor recurrence and computed tomography (CT) image at 8 weeks after surgery. (A, B) Mesenchymal origin cells with moderate cellularity show malignant features including anisokaryosis, prominent nucleoli, basophilic cytoplasm, coarse chromatin, and increased volume of cytoplasm. (C) A transverse image of the lung revealing multiple nodules (yellow arrows) on CT. Magnification: (A) 400× and (B) 1,000×.

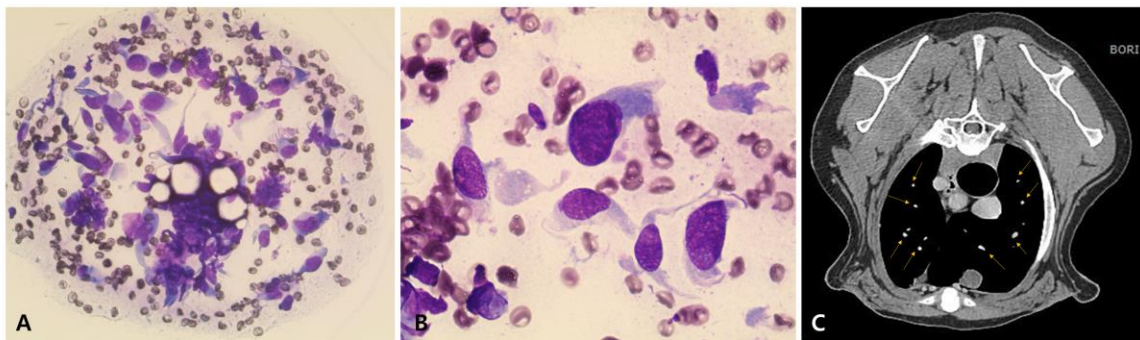

Supplement: jvms-81-434-s001.pdf [file jvms-81-434-s001.pdf]
